# Supplementary material
Source: PubMed Central journal article supplement (PMC3250184)
Supplement: 1110857108_pnas.1110857108_SI.pdf [file 1110857108_pnas.1110857108_SI.pdf]

# Supporting Information

Pandey et al. 10.1073/pnas.1110857108

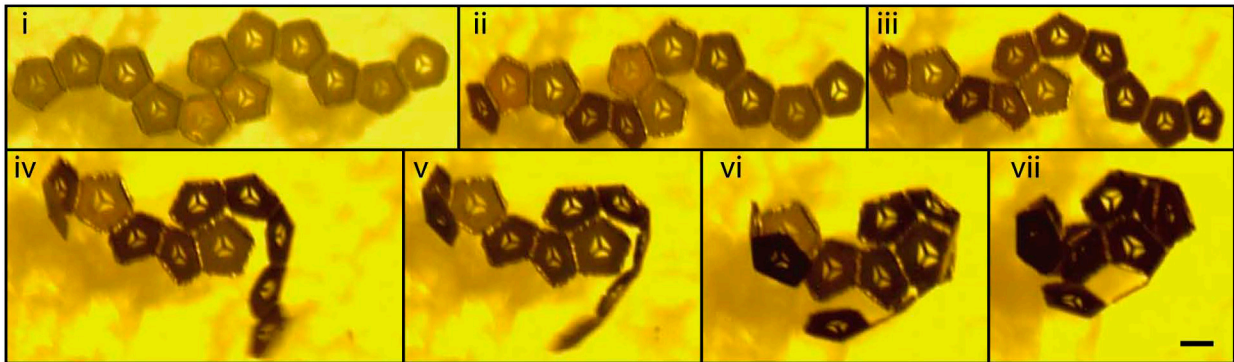

Fig. S1. Folding pathway for the dodecahedron ( $V_c$ ). Optical microscopy images showing a folding pathway of a dodecahedral net with  $V_c = 2$  as in Fig. 2A.

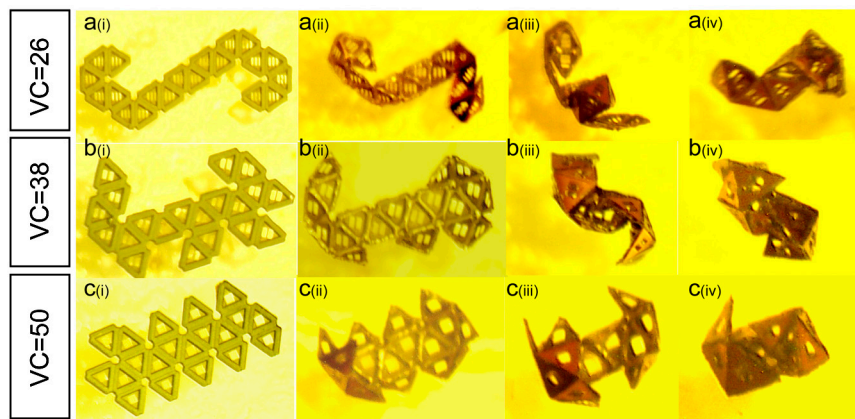

Fig. S2. Folding pathways for the icosahedron. Optical microscopy images showing folding pathways of icosahedral nets with 3D structure for the icosahedron. A  $i-iv$ ,  $V_c = 26$ ; B  $i-iv$ ,  $V_c = 38$ ; C  $i-iv$ ,  $V_c = 50$ .



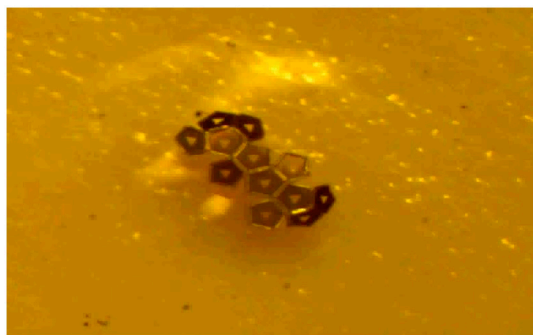

**Movie S1.** Folding pathway for the dodecahedron ( $V_c = 10$ ). Optical microscopy movie of self-folding for a dodecahedral net with  $V_c = 10$  as in Fig 2C.

[Movie S1 \(WMV\)](#)

**Table S1. Yields for all 300- $\mu\text{m}$  dodecahedron nets**

| Net                         | %A | %B | %C |
|-----------------------------|----|----|----|
| $V_c = 2$                   | 0  | 14 | 86 |
| $V_c = 6$                   | 16 | 34 | 50 |
| $V_c = 10$                  | 34 | 44 | 22 |
| $R_g = 1,102.2 \mu\text{m}$ | 0  | 8  | 92 |
| $R_g = 800.9 \mu\text{m}$   | 4  | 10 | 86 |
| $R_g = 693.7 \mu\text{m}$   | 6  | 16 | 78 |

Fifty samples were tested for each net.

**Table S2. Yields for all 300- $\mu\text{m}$  truncated octahedron nets**

| Net                         | %A | %B | %C  |
|-----------------------------|----|----|-----|
| $V_c = 2$                   | 0  | 0  | 100 |
| $V_c = 7$                   | 0  | 22 | 78  |
| $V_c = 12$                  | 24 | 34 | 42  |
| $R_g = 1,306.3 \mu\text{m}$ | 0  | 0  | 100 |
| $R_g = 912.7 \mu\text{m}$   | 0  | 18 | 82  |
| $R_g = 795.0 \mu\text{m}$   | 12 | 22 | 66  |

Fifty samples were tested for each net.

**Table S3. Yields of 300- $\mu\text{m}$  dodecahedron nets with same number of vertex connections ( $V_c = 10$ ) and different radius of gyration ( $R_g$ )**

| Net, $\mu\text{m}$ | %A | %B | %C |
|--------------------|----|----|----|
| $R_g = 810.2$      | 8  | 56 | 36 |
| $R_g = 797.4$      | 8  | 60 | 32 |
| $R_g = 755.4$      | 22 | 50 | 28 |
| $R_g = 747.7$      | 20 | 62 | 18 |

**Table S4. Yields of 300- $\mu\text{m}$  truncated octahedron nets with same number of vertex connections ( $V_c = 12$ ) and different radius of gyration ( $R_g$ )**

| Net, $\mu\text{m}$ | %A | %B | %C |
|--------------------|----|----|----|
| $R_g = 911.6$      | 16 | 30 | 54 |
| $R_g = 870.2$      | 22 | 24 | 54 |
| $R_g = 867.4$      | 20 | 28 | 52 |
| $R_g = 852.8$      | 30 | 38 | 32 |
